# Supplementary material for: Heart Failure With Reduced Ejection Fraction Is Characterized by Systemic NEP Downregulation
Source: PubMed Central journal article supplement — JACC Basic Transl Sci. 2020 Jul 27;5(7):715–26. doi: 10.1016/j.jacbts.2020.05.011 (PMC7393434; doi:10.1016/j.jacbts.2020.05.011), 2020-07-27

## Supplementary Figures

**Supplementary Figure 1.** Relation of myocardial BNP expression and cGMP concentrations with different tissues and plasma NEP concentrations and activity.

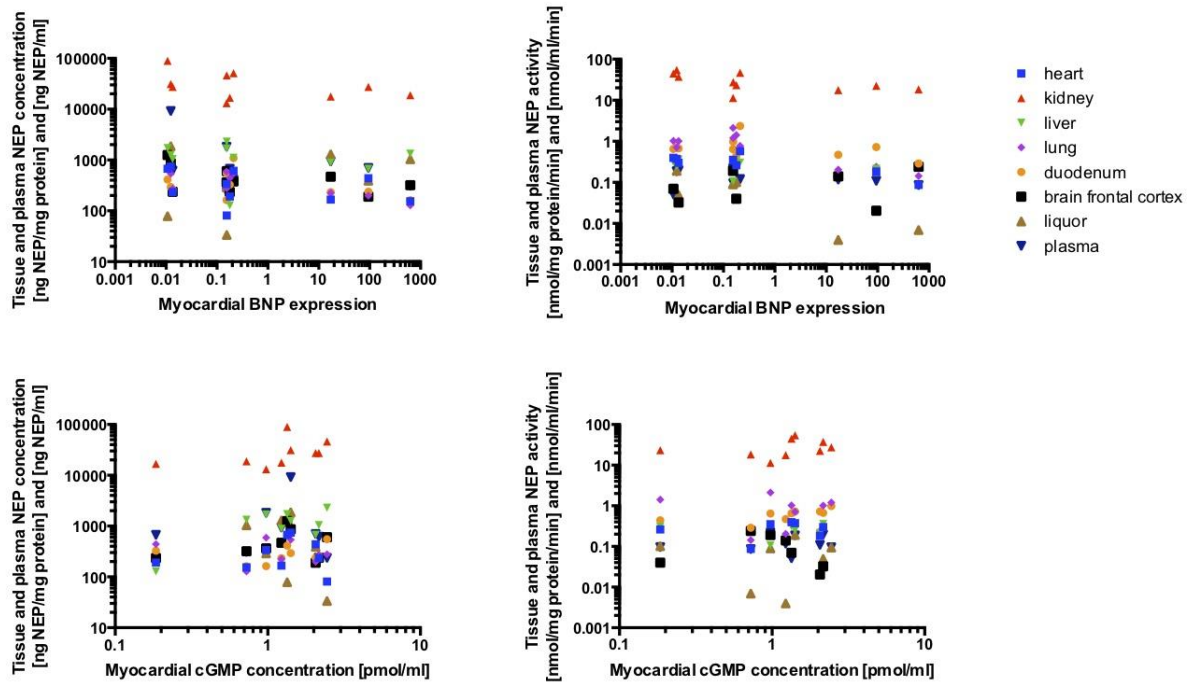

**Supplementary Figure 2.** Relation of plasma NTproBNP and ANP concentrations with different tissues and plasma NEP concentrations and activity.

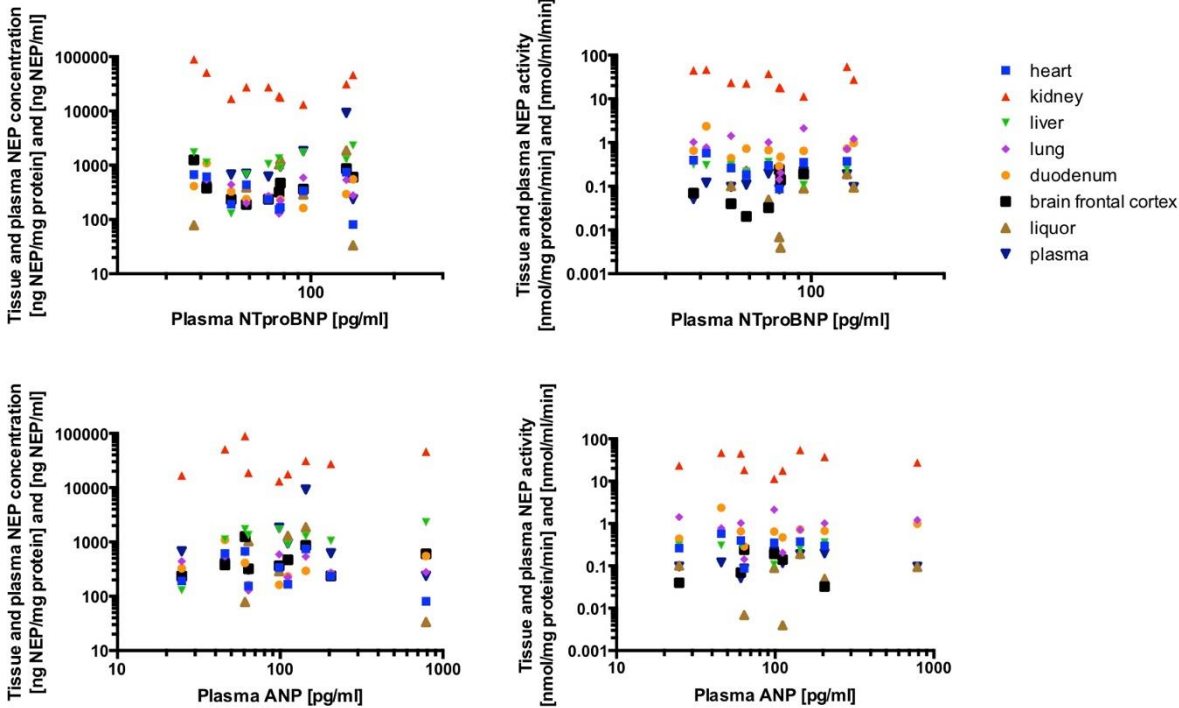

**Supplementary Figure 3.** Plasma and liquor A. NEP concentrations and B. NEP activity for HF animals and controls. Results are shown as median and Q1-Q3 (25<sup>th</sup> and 75<sup>th</sup> percentiles). Pooled samples were compared by the Mann-Whitney-U test.

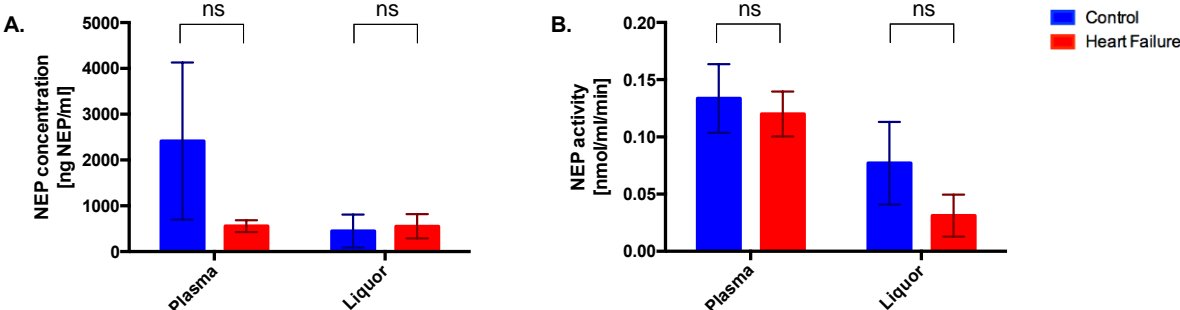

Supplement: mmc1.pdf [file mmc1.pdf]
